# Supplementary material for: Potential Role of Gastrointestinal Microbiota in Growth Regulation of Yellowtail Kingfish Seriola lalandi in Different Stocking Densities
Source: MDPI journal article supplement (doi:10.3390/fishes7040154), 2022-06-28
Supplement: s1 [file s1]

## Supplemental Figures S1-S5

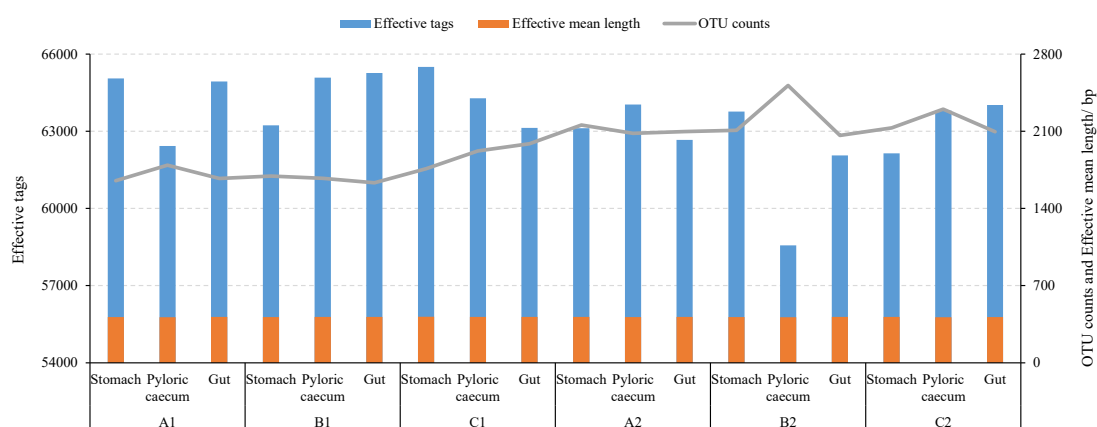

**Figure S1.** The sequencing data of all samples.

Notes: A1, B1 and C1 represented three different treatments at the beginning of the trial, while A2, B2 and C2 represented those three treatments at the end of the trial.

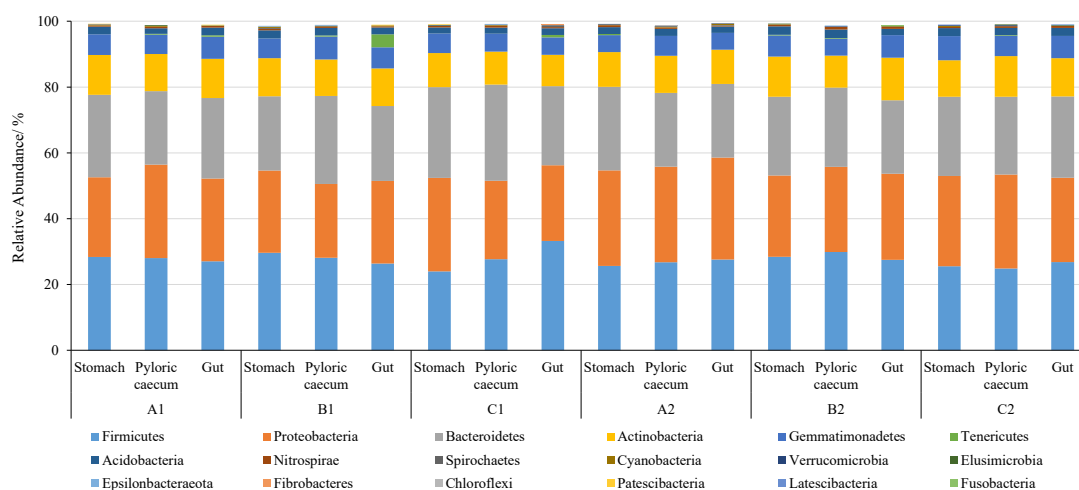

**Figure S2.** The dominant colonizing phyla in yellowtail kingfish gastrointestinal tract.

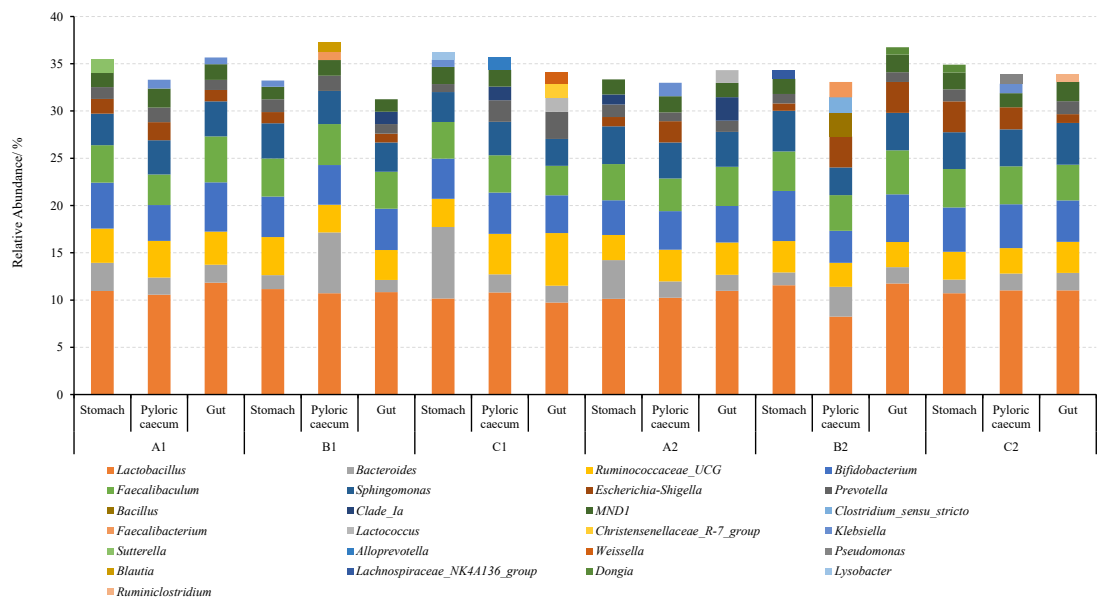

Figure S3. The dominant colonizing genera in yellowtail kingfish gastrointestinal tract.

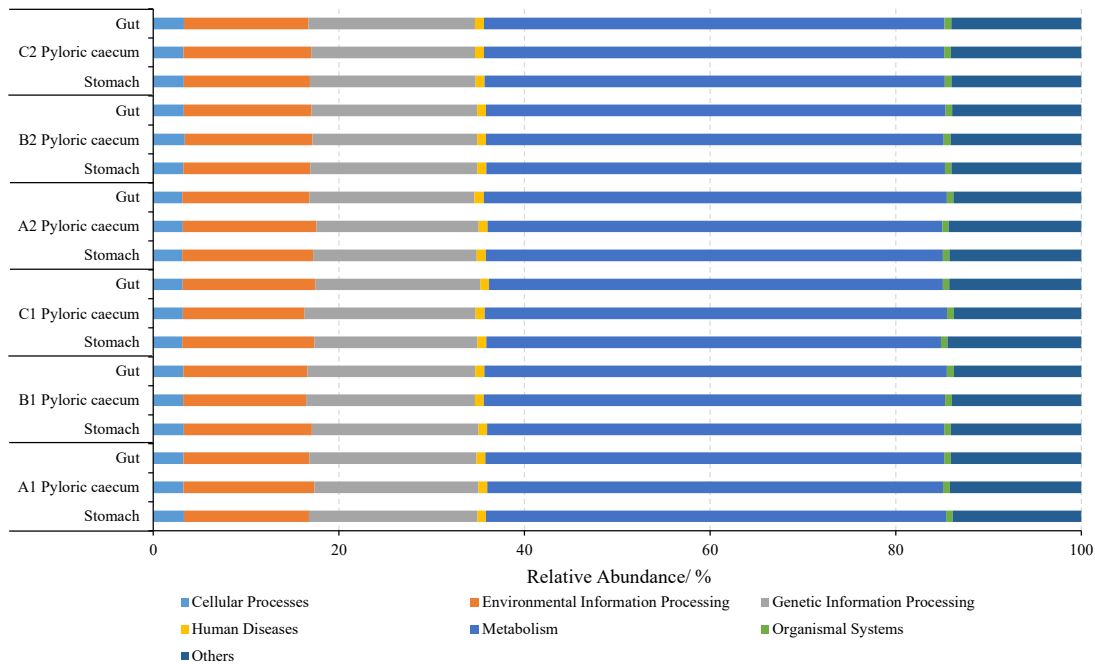

Figure S4. The dominant pathway at level 1 in each tissue of yellowtail kingfish.

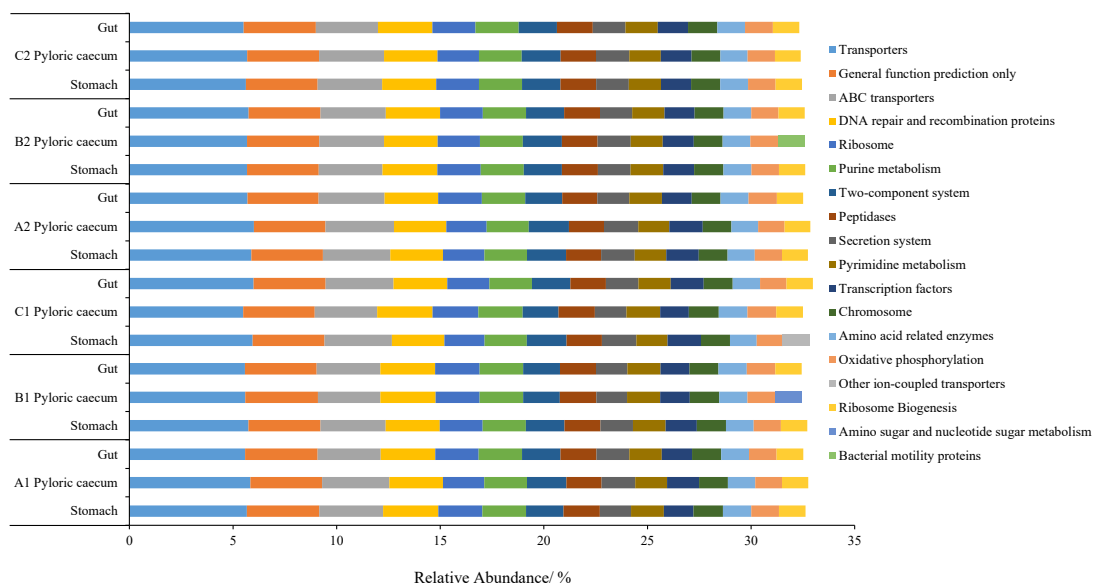

Figure S5. The dominant pathway at level 3 in each tissue of yellowtail kingfish.
